# Supplementary material
Source: PubMed Central journal article supplement (PMC3624305)
Supplement: JVI.02743-12_zjv999097566so1.pdf [file JVI.02743-12_zjv999097566so1.pdf]

**A**

Caramel, 3y

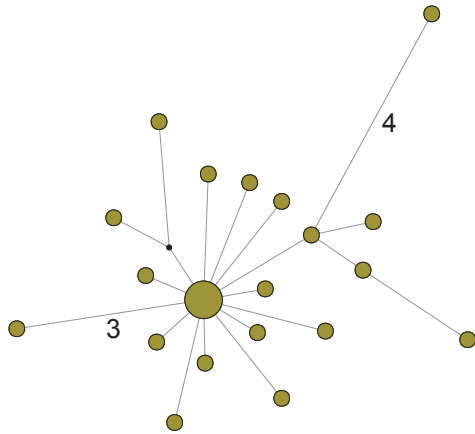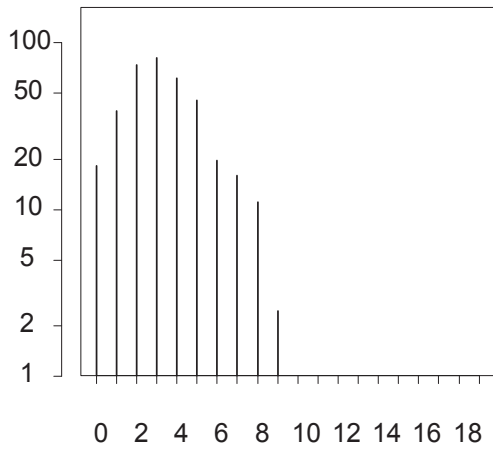

Gogol, 10y

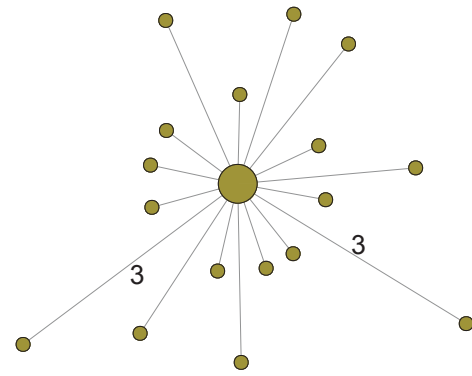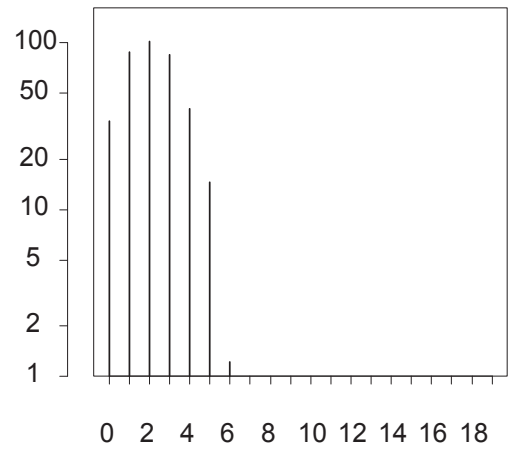

Gogol, 17y

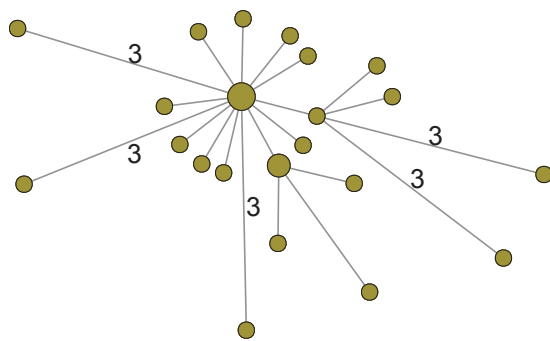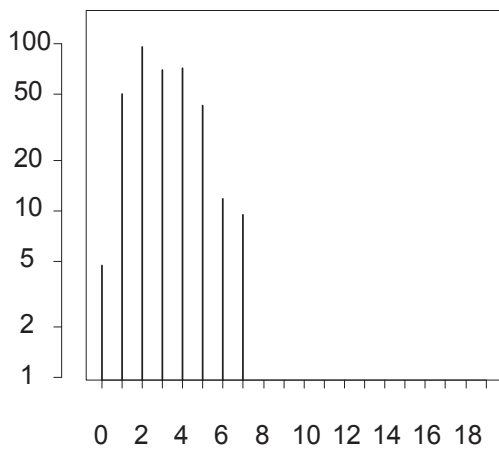

Jacobo, 6y

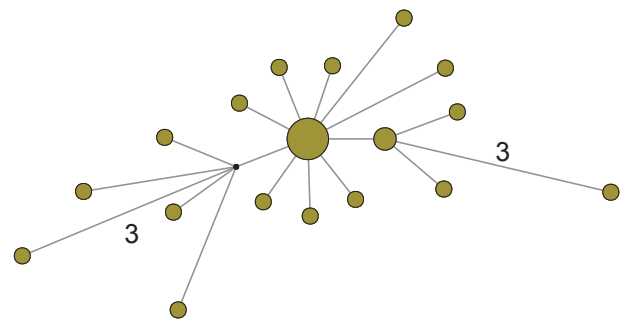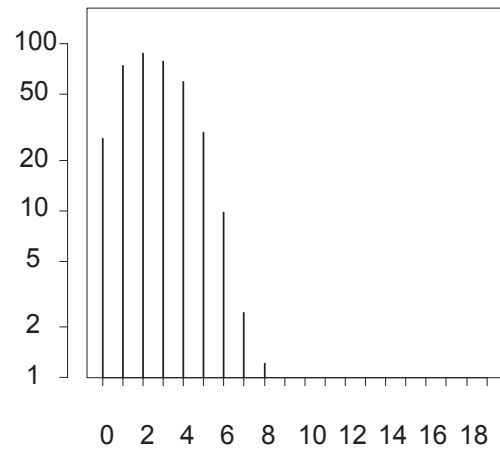

Kinshasa, 17y

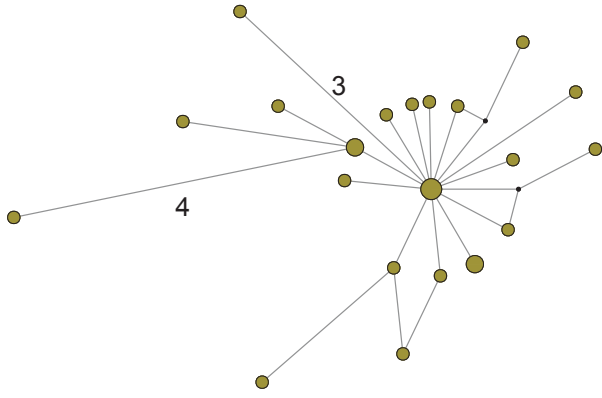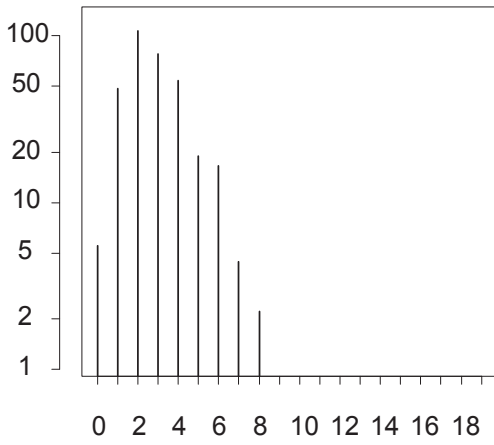

Kinshasa, 11y

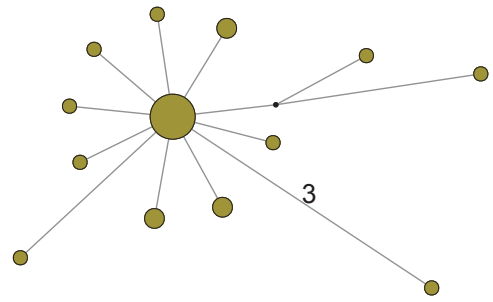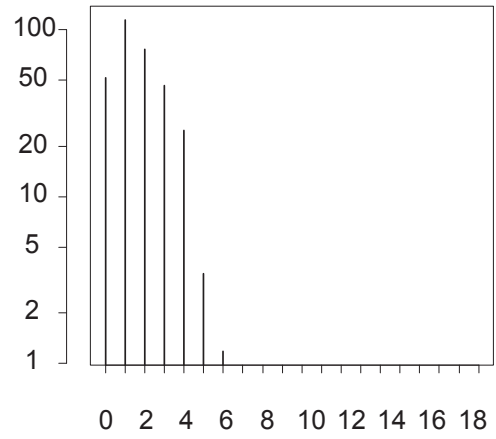

Kiriku, 3y

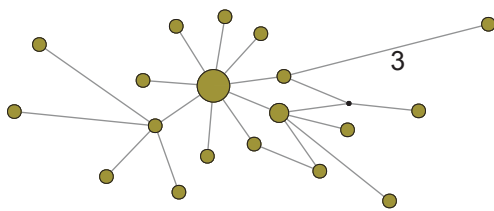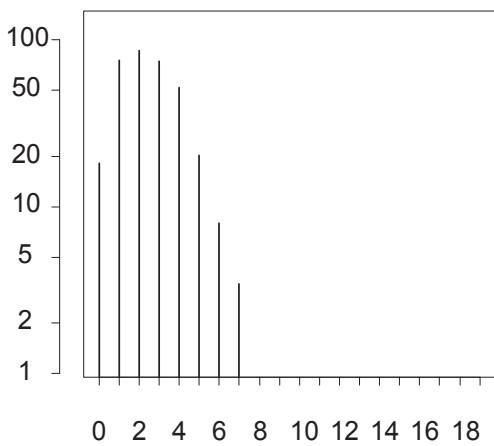

Romario, 9y

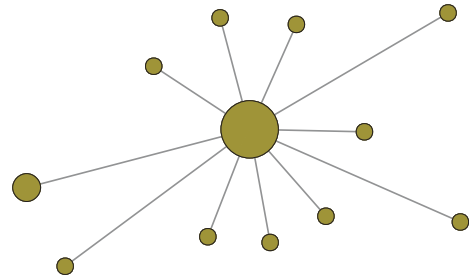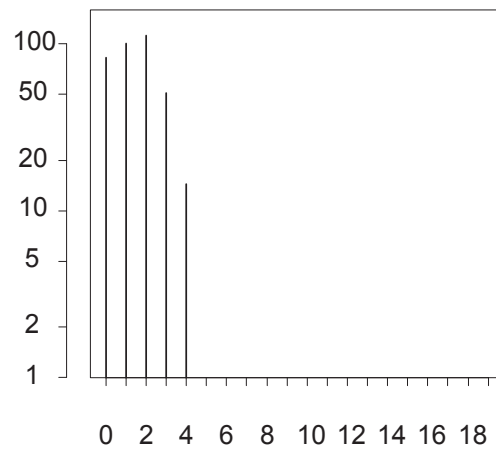

Rubra, 31y

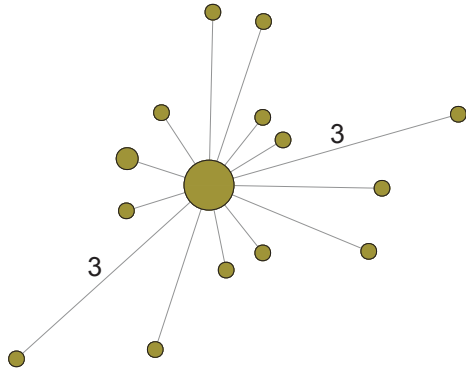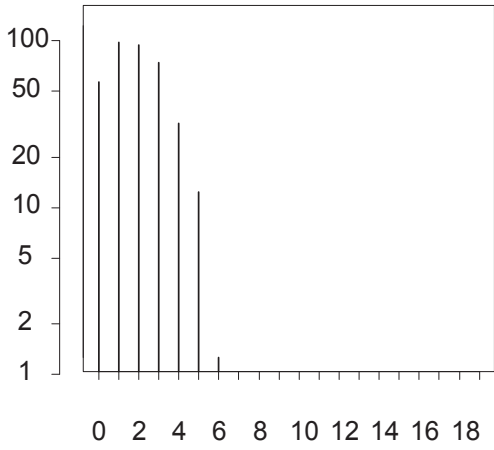

Sagu, 13y

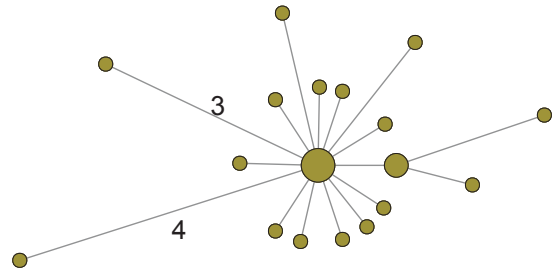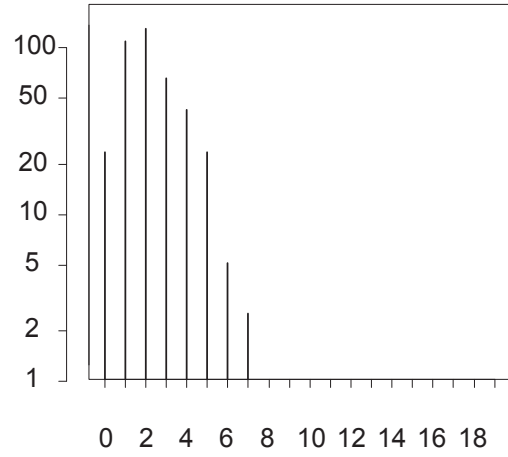

Sumatra, 38y

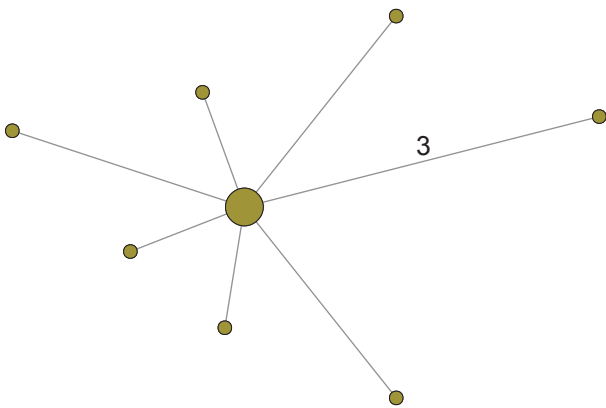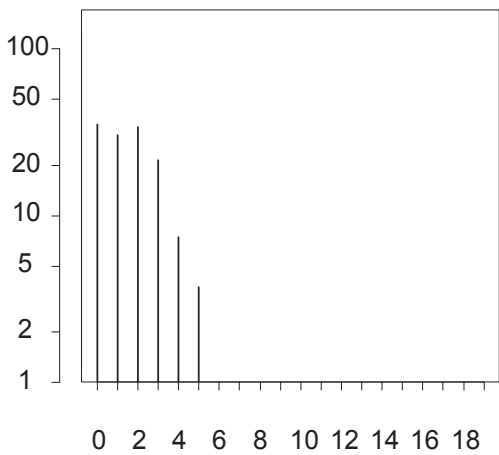

Utan, 7y

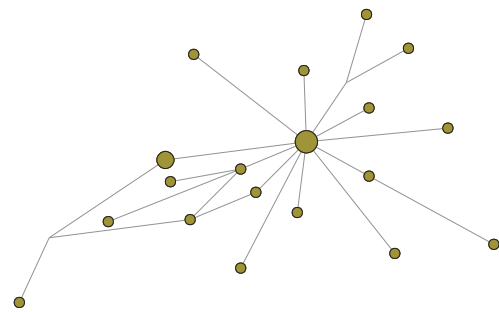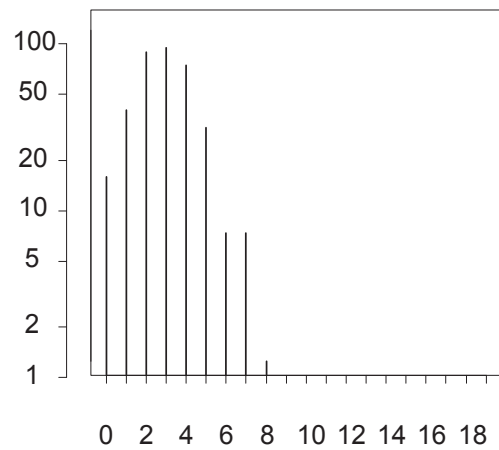

Utan, 11y

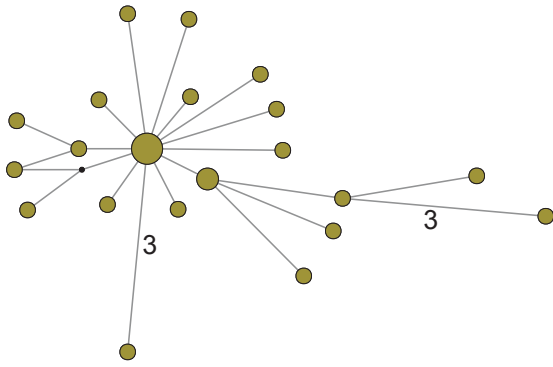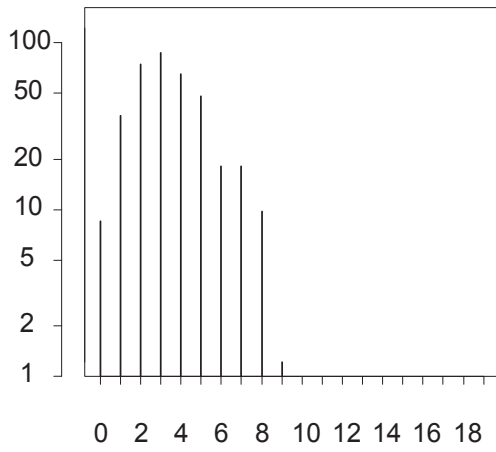

Yao, 8y

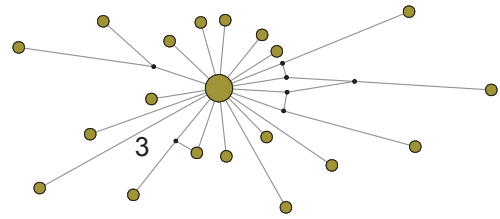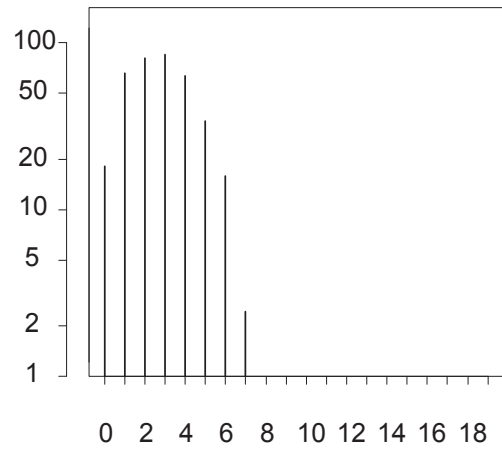

**B**

Celine, 10y

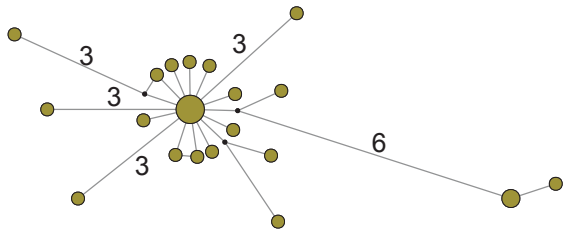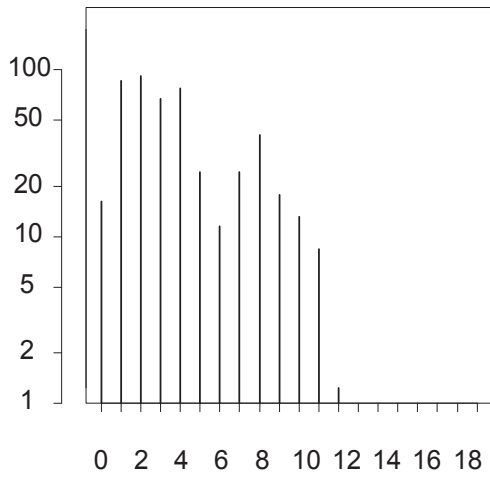

Coco, 24y

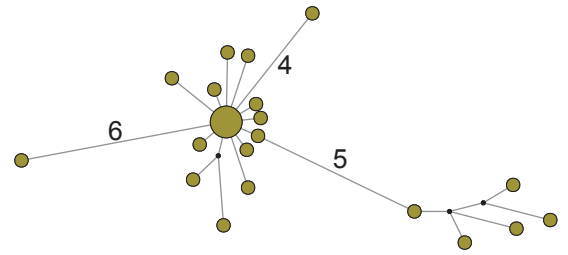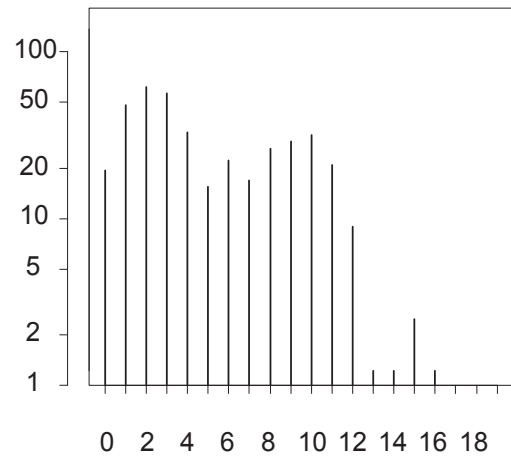

Kabisha, 24y

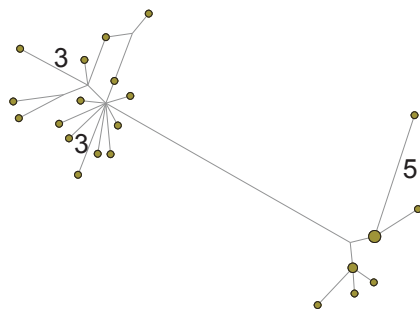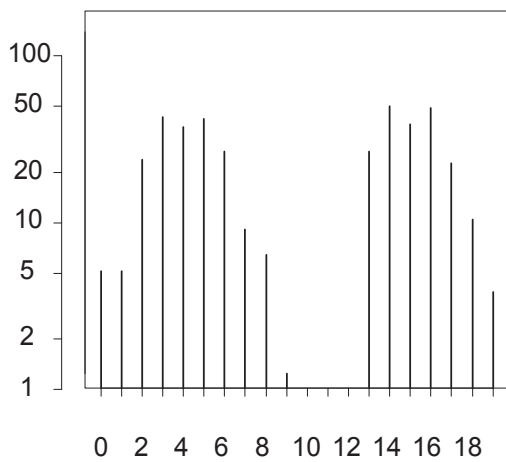

Kabisha, 25y

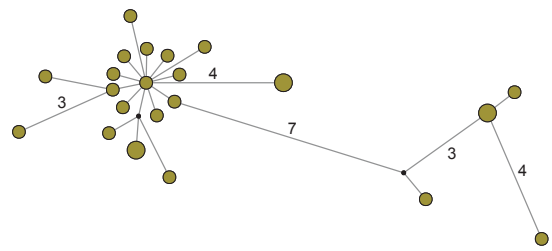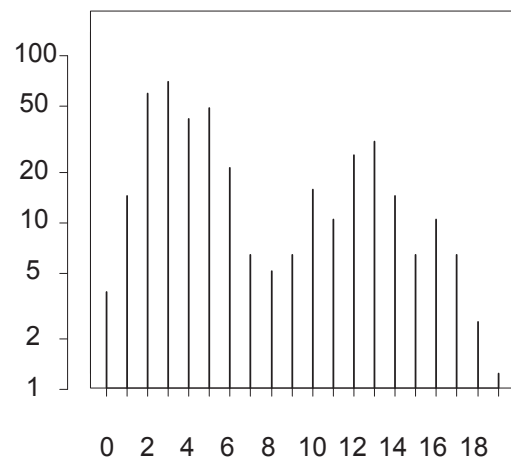

Kaos, 29y

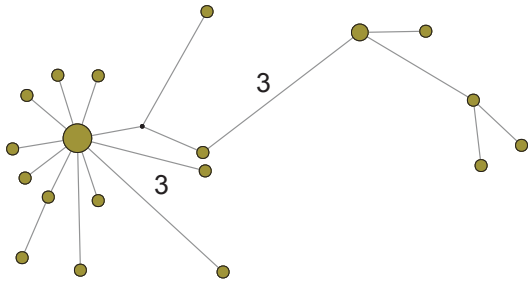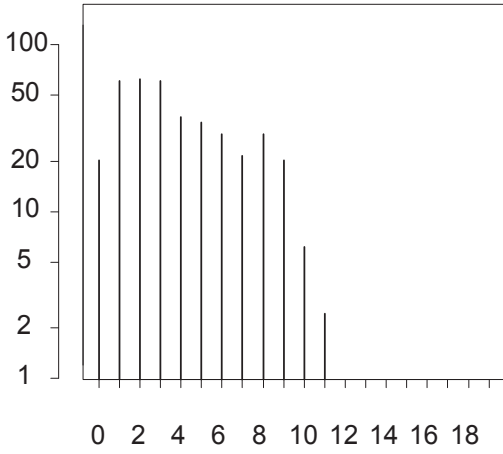

Louise, 25y

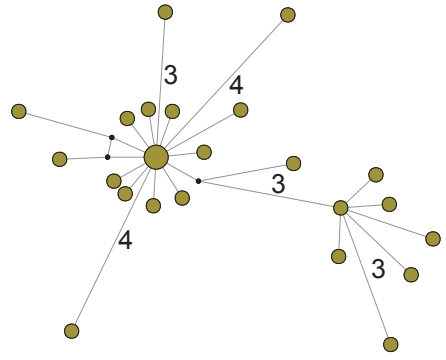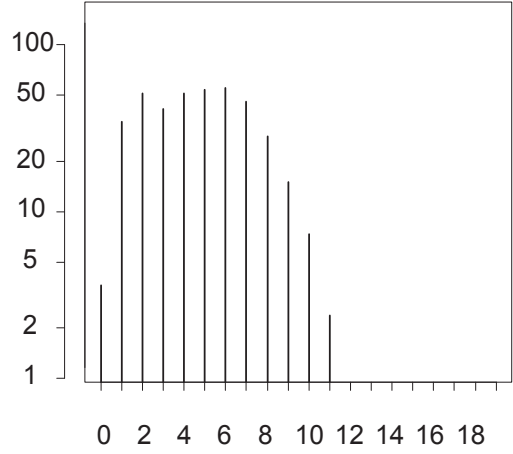

Rebecca, 7y

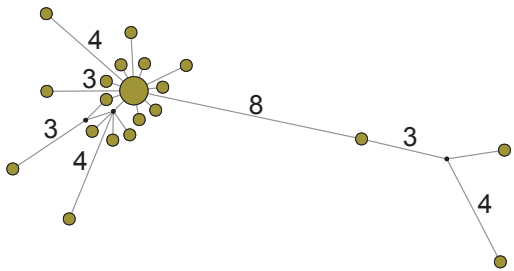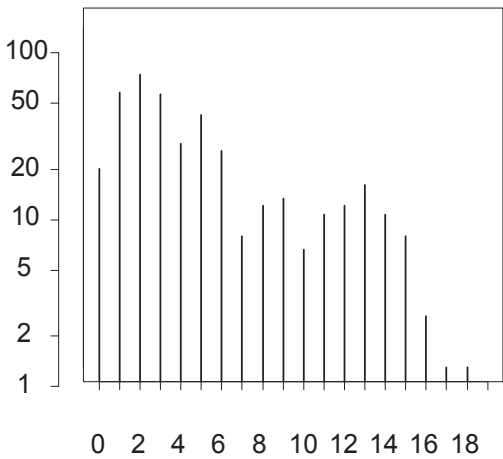

Rubra, 35y

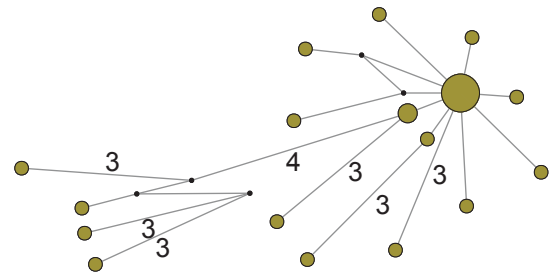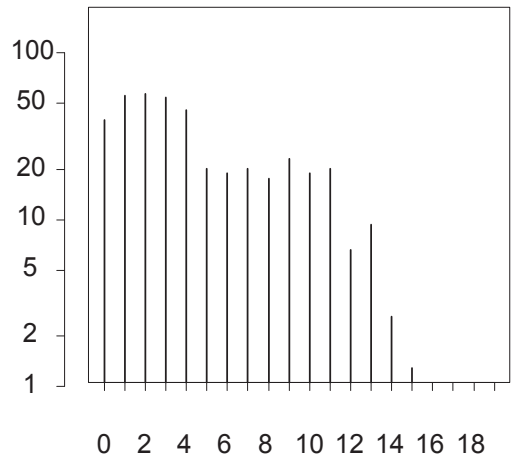

Rubra, 38y

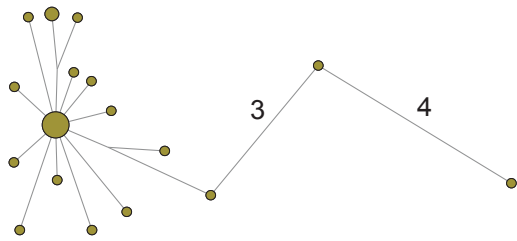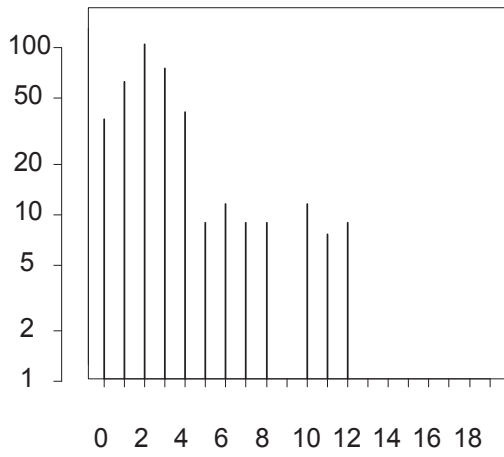

Sagu, 17y

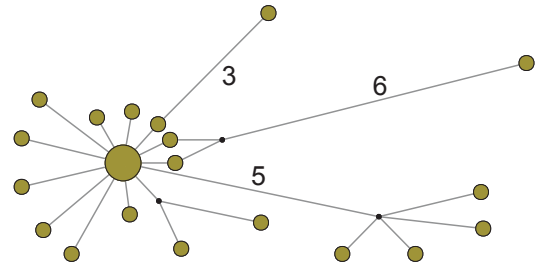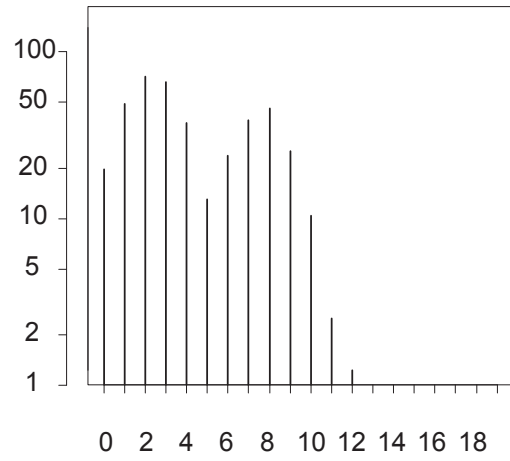

Sagu, 19y

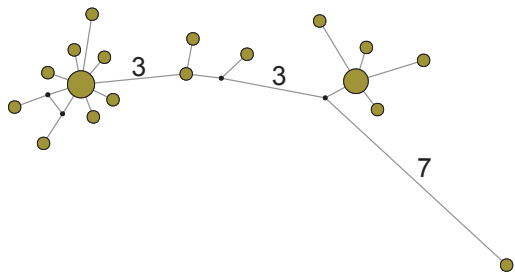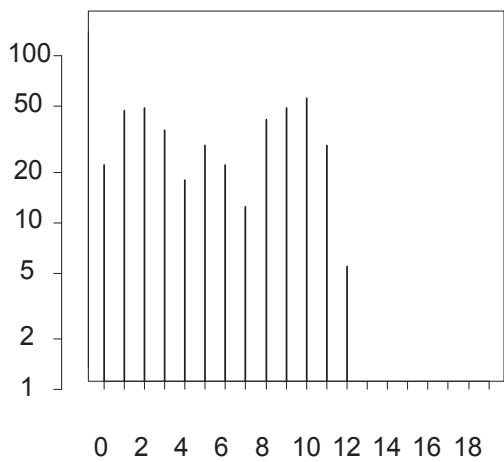

Shogun, 7y

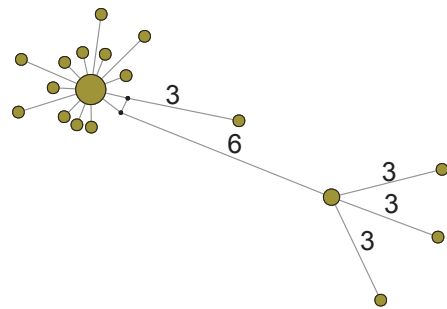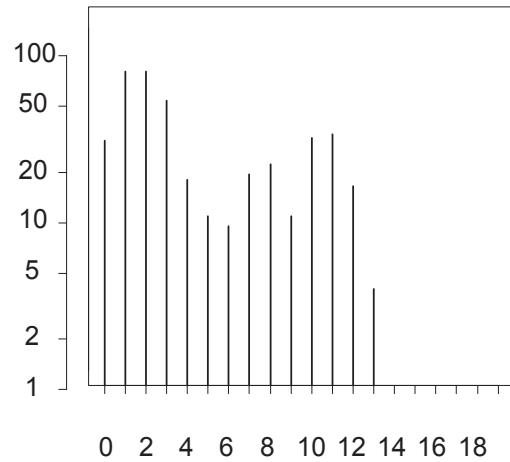

Sumatra, 40y

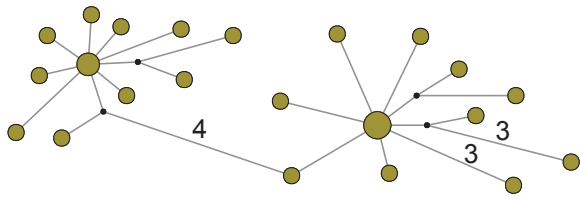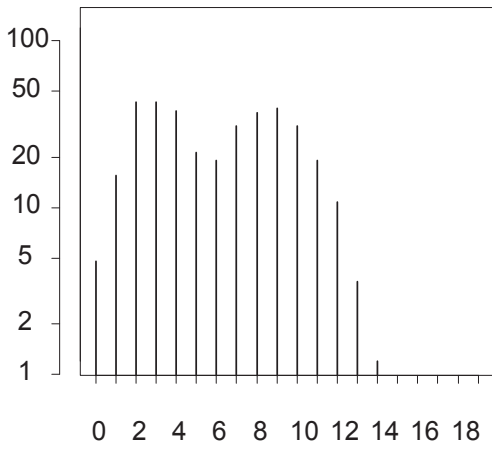

Yucca, 32y

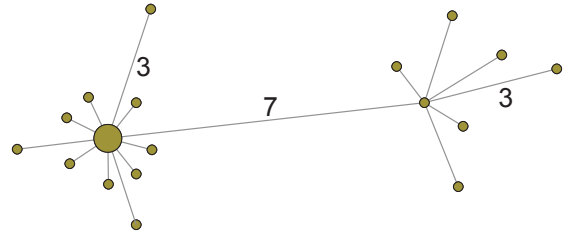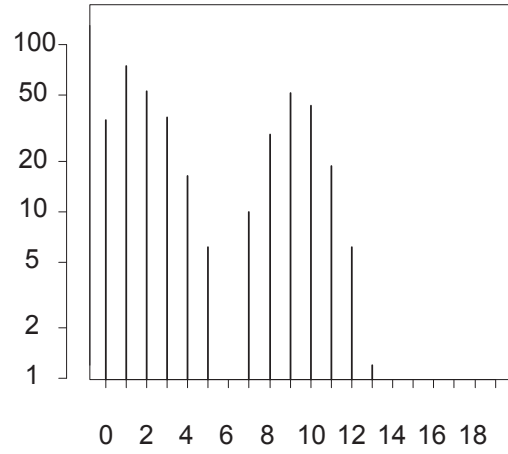

Yucca, 34y

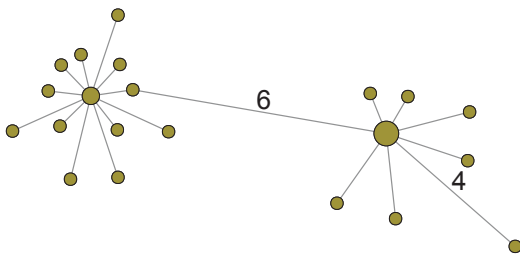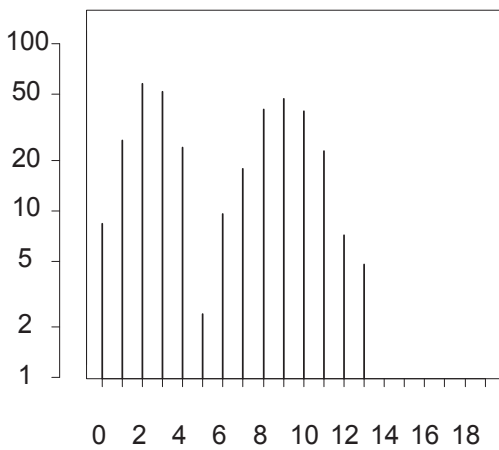

Zyon, 37y

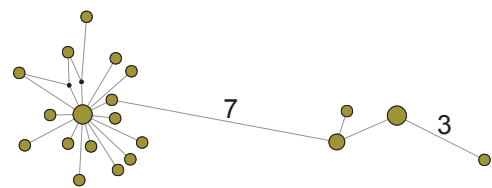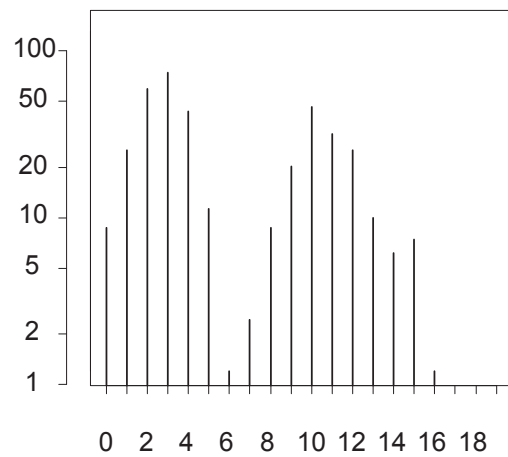



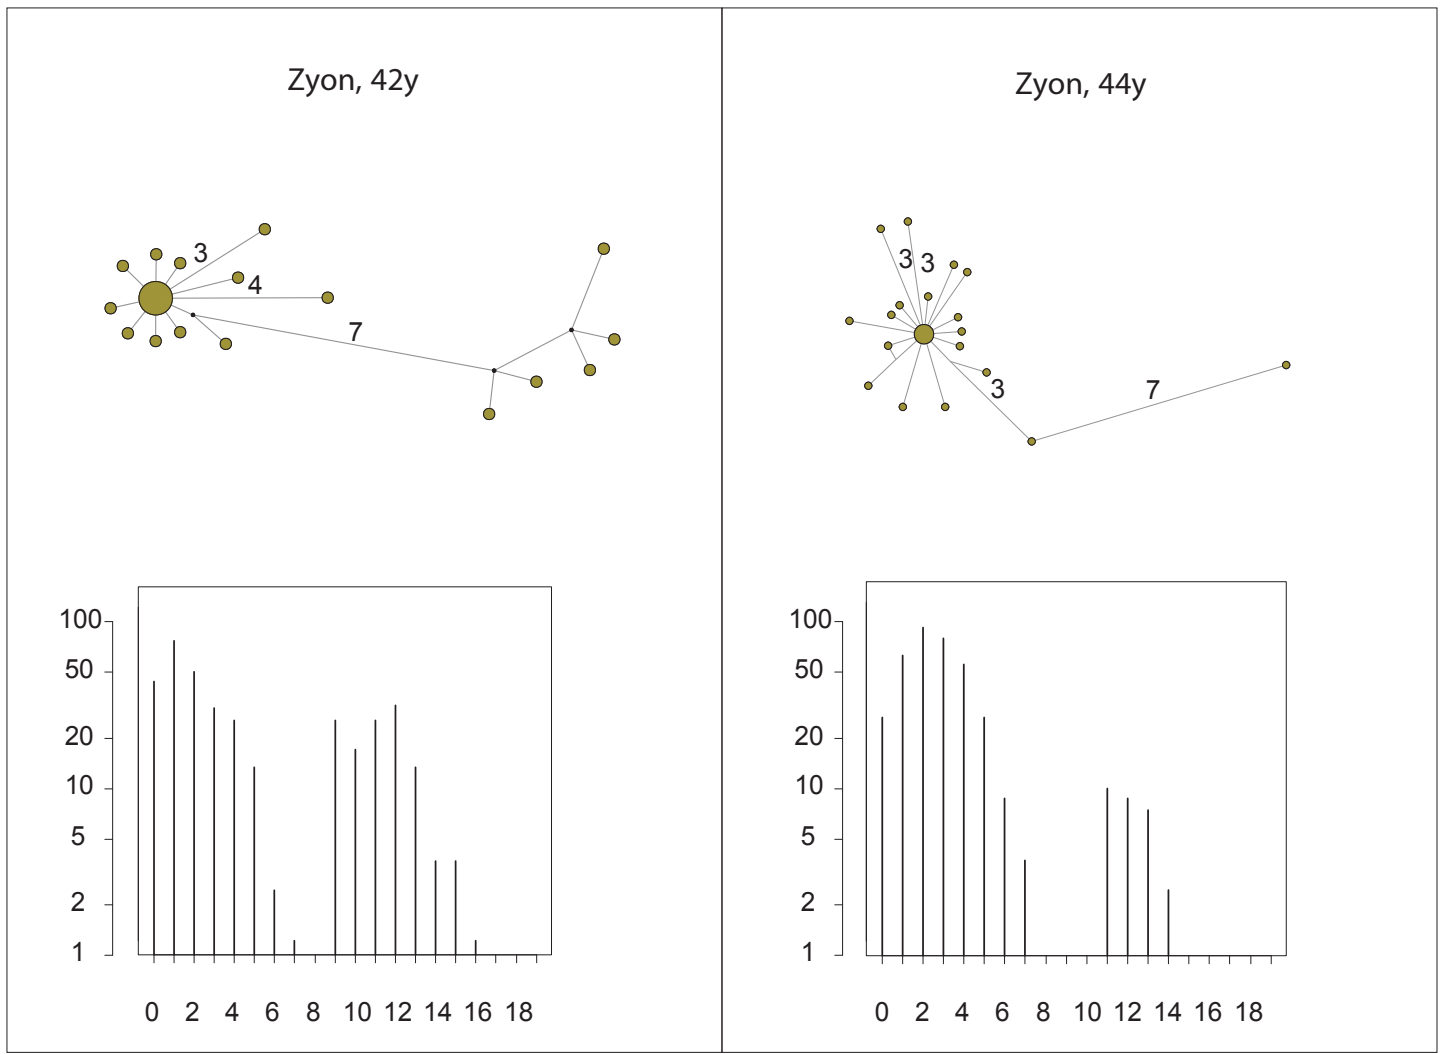

**Supplementary Figure 1.** Mismatch distributions and sequence networks for all individuals analyzed in this study. Plots are paired for each individual chimpanzee sample (y=years refers to individual age at time of sampling) with mismatch distribution on the left and network on the right. Mismatch distribution present the frequency of the number of mismatches (y-axis) according to the number of basepairs within the sequence alignment (x- axis). Within each network, node size is proportional to the frequency of the sequence occurrence (total n=15-25 for each individual). Branch lengths are directly related to the number of mutations between sequences, with values noted for differences greater than two base pairs.

Gogol

- 10y
- 17y

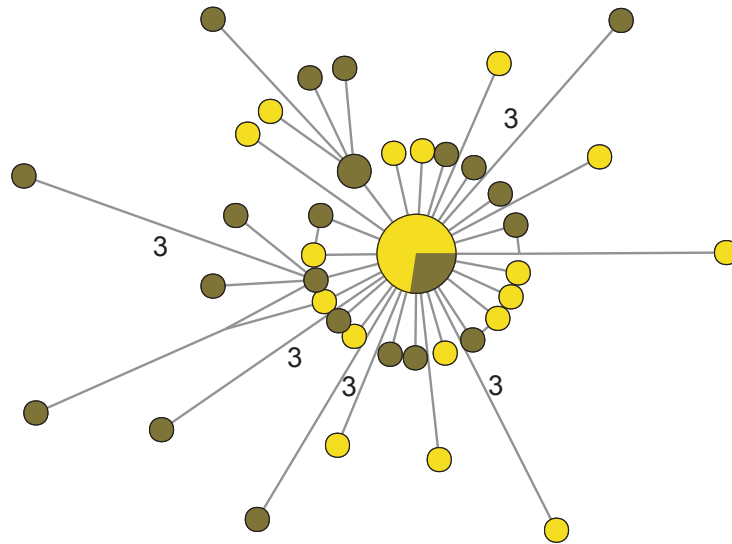

Kinshasa

- 11y
- 17y

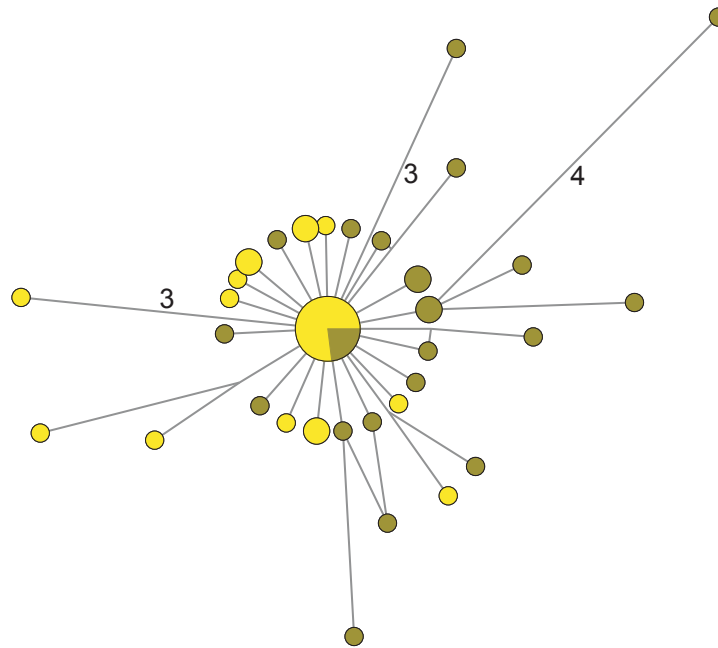

Rubra

- 31y
- 35y
- 38y

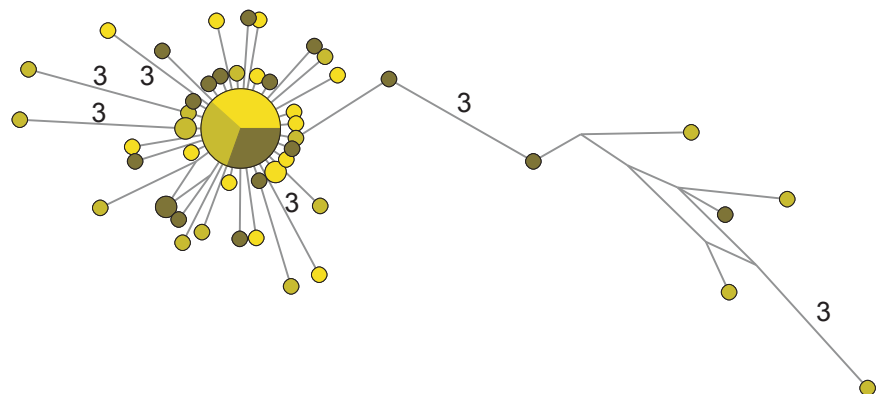

Sagu

- 13y
- 17y
- 19y

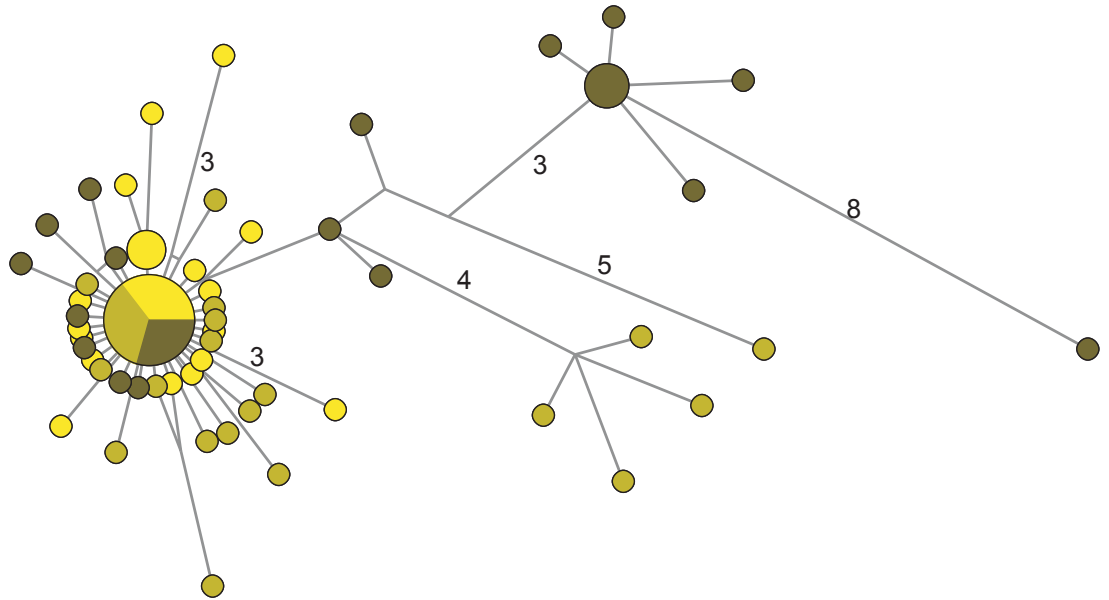

Sumatra

- 38y
- 40y

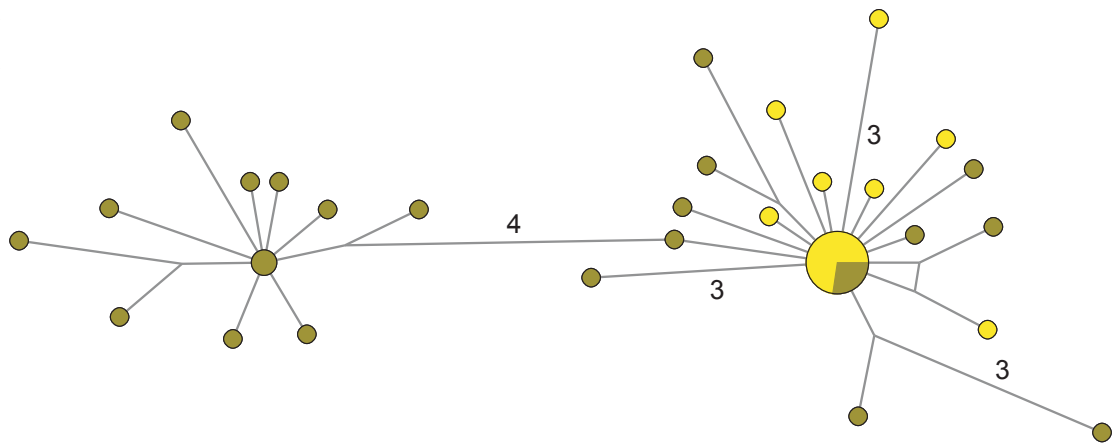

Utan

- 7y
- 11y

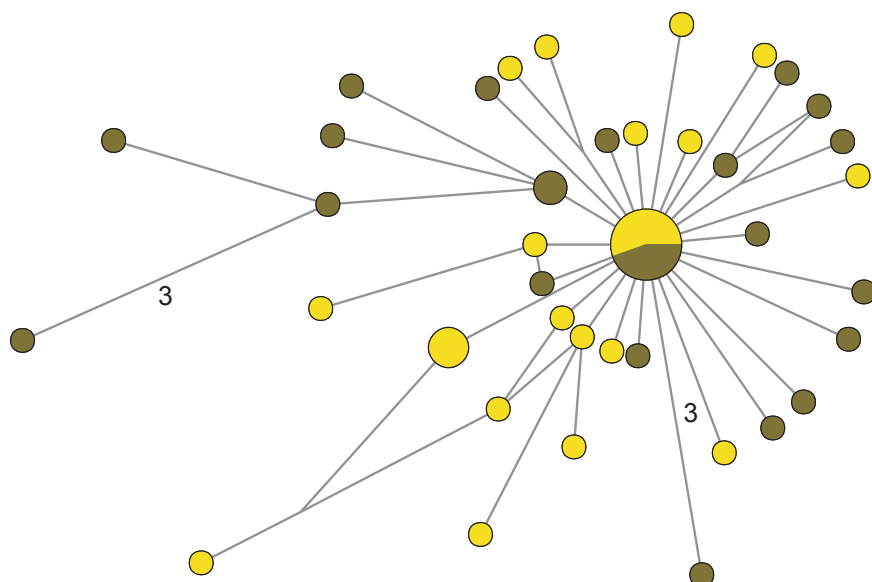

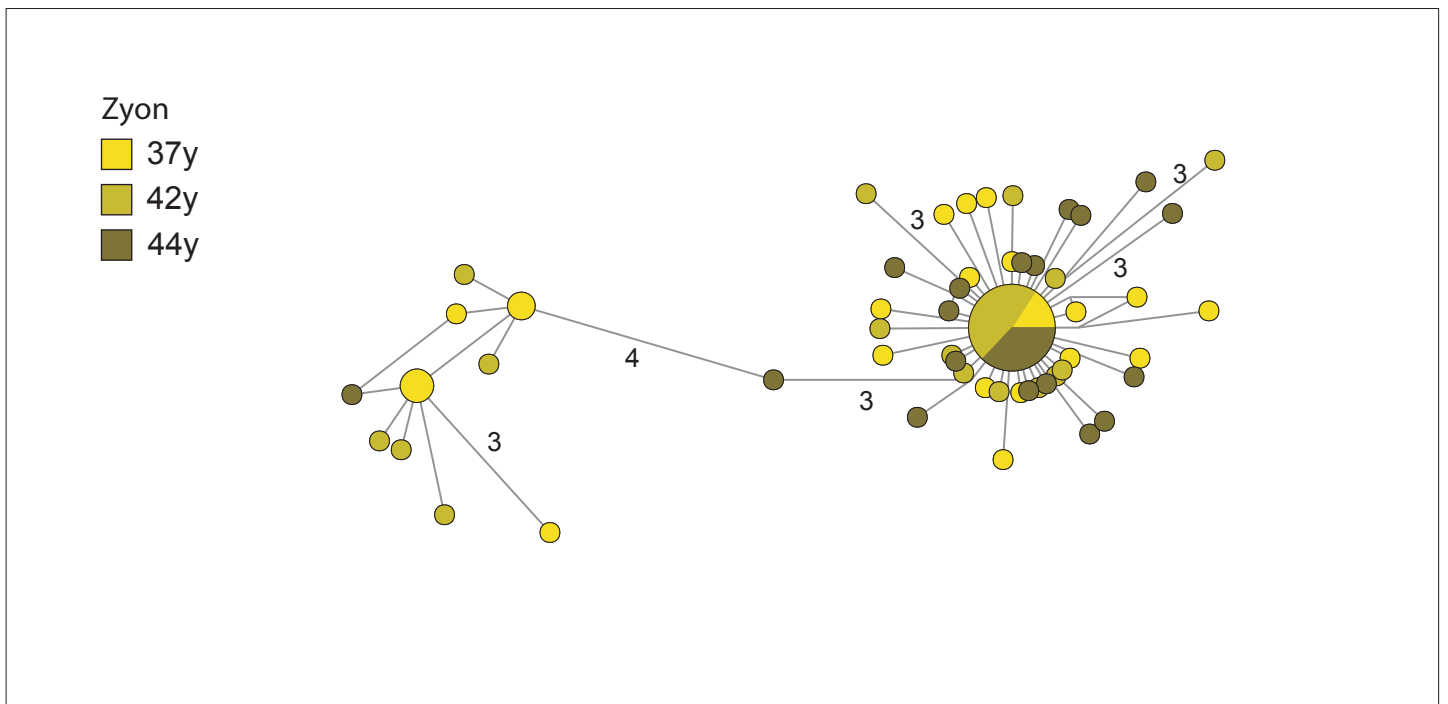

**Supplementary Figure 2.** Individual's networks from all serially sampled chimpanzees. y=years; refers to individual age at time of sampling. Within each network, node size is proportional to the frequency of the sequence occurrence. Branch lengths are directly related to the number of mutations between sequences, with values noted for differences greater than two base pairs.
